# Supplementary material for: Human Positioning in Close-Encounter Photographs and the Effect on Public Perceptions of Zoo Animals
Source: Animals (Basel). 2021 Dec 21;12(1):11. doi: 10.3390/ani12010011 (PMC8749715; doi:10.3390/ani12010011)
Supplement: Supplementary file 1 [file animals-12-00011-s001.zip › Supplementary File S1.pdf]

**Supplementary File S1. Online Survey.**

This page of questions applies to the photo shown below. Please take a minute to examine it before answering the next question.

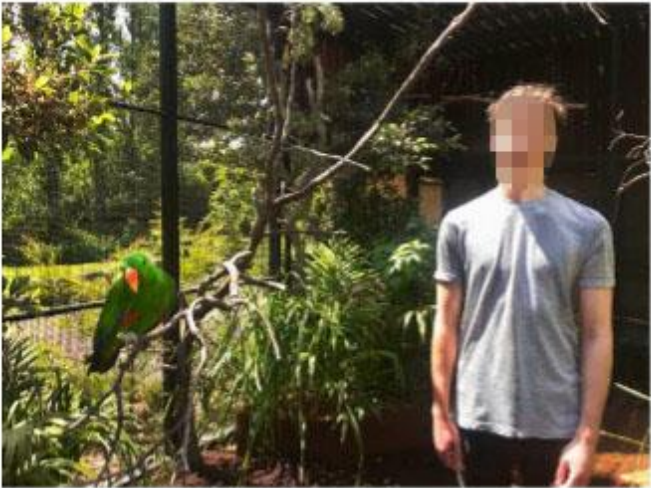

Please rate how well each of the below words describes the zoo animal in the above photo: \*

|           | Not at<br>all so      | Slightly<br>so        | Moderately<br>so      | Very<br>much<br>so    | Extremely<br>so       | Unsure                |
|-----------|-----------------------|-----------------------|-----------------------|-----------------------|-----------------------|-----------------------|
| Happy     | <input type="radio"/> |
| Sad       | <input type="radio"/> |
| Relaxed   | <input type="radio"/> |
| Nervous   | <input type="radio"/> |
| Friendly  | <input type="radio"/> |
| Dangerous | <input type="radio"/> |

\* This question addressed a separate research question that is not included in this thesis

How much do you agree or disagree with the following statements? \*

|                                                                       | Strongly disagree     | Disagree              | Somewhat disagree     | Neither agree nor disagree | Somewhat agree        | Agree                 | Strongly agree        |
|-----------------------------------------------------------------------|-----------------------|-----------------------|-----------------------|----------------------------|-----------------------|-----------------------|-----------------------|
| Zoos play an important role in the conservation of threatened species | <input type="radio"/> | <input type="radio"/> | <input type="radio"/> | <input type="radio"/>      | <input type="radio"/> | <input type="radio"/> | <input type="radio"/> |
| Animals in a zoo are as healthy as those in the wild                  | <input type="radio"/> | <input type="radio"/> | <input type="radio"/> | <input type="radio"/>      | <input type="radio"/> | <input type="radio"/> | <input type="radio"/> |
| It matters to me if an animal is in pain                              | <input type="radio"/> | <input type="radio"/> | <input type="radio"/> | <input type="radio"/>      | <input type="radio"/> | <input type="radio"/> | <input type="radio"/> |
| Animals in a zoo are as happy as those in the wild                    | <input type="radio"/> | <input type="radio"/> | <input type="radio"/> | <input type="radio"/>      | <input type="radio"/> | <input type="radio"/> | <input type="radio"/> |

|                                                                     | Strongly disagree     | Disagree              | Somewhat disagree     | Neither agree nor disagree | Somewhat agree        | Agree                 | Strongly agree        |
|---------------------------------------------------------------------|-----------------------|-----------------------|-----------------------|----------------------------|-----------------------|-----------------------|-----------------------|
| Zoos are important for educating the public about animals           | <input type="radio"/> | <input type="radio"/> | <input type="radio"/> | <input type="radio"/>      | <input type="radio"/> | <input type="radio"/> | <input type="radio"/> |
| I enjoy going to the zoo                                            | <input type="radio"/> | <input type="radio"/> | <input type="radio"/> | <input type="radio"/>      | <input type="radio"/> | <input type="radio"/> | <input type="radio"/> |
| I feel a strong emotional bond with animals.                        | <input type="radio"/> | <input type="radio"/> | <input type="radio"/> | <input type="radio"/>      | <input type="radio"/> | <input type="radio"/> | <input type="radio"/> |
| People who want to hunt should be provided the opportunity to do so | <input type="radio"/> | <input type="radio"/> | <input type="radio"/> | <input type="radio"/>      | <input type="radio"/> | <input type="radio"/> | <input type="radio"/> |

\* These questions addressed a separate research question that is not included in this thesis

|                                                                                                                                          | Strongly disagree     | Disagree              | Somewhat disagree     | Neither agree nor disagree | Somewhat agree        | Agree                 | Strongly agree        |
|------------------------------------------------------------------------------------------------------------------------------------------|-----------------------|-----------------------|-----------------------|----------------------------|-----------------------|-----------------------|-----------------------|
| Going to the zoo is a fun family activity                                                                                                | <input type="radio"/> | <input type="radio"/> | <input type="radio"/> | <input type="radio"/>      | <input type="radio"/> | <input type="radio"/> | <input type="radio"/> |
| Humans should manage wildlife populations so that humans benefit                                                                         | <input type="radio"/> | <input type="radio"/> | <input type="radio"/> | <input type="radio"/>      | <input type="radio"/> | <input type="radio"/> | <input type="radio"/> |
| Zoos should offer opportunities for people to take photos with the animals                                                               | <input type="radio"/> | <input type="radio"/> | <input type="radio"/> | <input type="radio"/>      | <input type="radio"/> | <input type="radio"/> | <input type="radio"/> |
| Most animals are more like computer programs, i.e. mechanically responding to instinctive urges without awareness of what they are doing | <input type="radio"/> | <input type="radio"/> | <input type="radio"/> | <input type="radio"/>      | <input type="radio"/> | <input type="radio"/> | <input type="radio"/> |

How much do you agree or disagree with the following statements? \*

|                                                                 | Strongly disagree     | Disagree              | Somewhat disagree     | Neither agree nor disagree | Somewhat agree        | Agree                 | Strongly agree        |
|-----------------------------------------------------------------|-----------------------|-----------------------|-----------------------|----------------------------|-----------------------|-----------------------|-----------------------|
| It is acceptable for animals to be raised for human consumption | <input type="radio"/> | <input type="radio"/> | <input type="radio"/> | <input type="radio"/>      | <input type="radio"/> | <input type="radio"/> | <input type="radio"/> |
| Animals should have rights similar to the rights of humans      | <input type="radio"/> | <input type="radio"/> | <input type="radio"/> | <input type="radio"/>      | <input type="radio"/> | <input type="radio"/> | <input type="radio"/> |
| Zoos are engaging for visitors                                  | <input type="radio"/> | <input type="radio"/> | <input type="radio"/> | <input type="radio"/>      | <input type="radio"/> | <input type="radio"/> | <input type="radio"/> |
| The use of animals for furs, skins and leather is acceptable    | <input type="radio"/> | <input type="radio"/> | <input type="radio"/> | <input type="radio"/>      | <input type="radio"/> | <input type="radio"/> | <input type="radio"/> |

  

|                                                                                         | Strongly disagree     | Disagree              | Somewhat disagree     | Neither agree nor disagree | Somewhat agree        | Agree                 | Strongly agree        |
|-----------------------------------------------------------------------------------------|-----------------------|-----------------------|-----------------------|----------------------------|-----------------------|-----------------------|-----------------------|
| Most animals are unaware of what is happening to them                                   | <input type="radio"/> | <input type="radio"/> | <input type="radio"/> | <input type="radio"/>      | <input type="radio"/> | <input type="radio"/> | <input type="radio"/> |
| We should strive for a world where humans and wildlife can live side by side in harmony | <input type="radio"/> | <input type="radio"/> | <input type="radio"/> | <input type="radio"/>      | <input type="radio"/> | <input type="radio"/> | <input type="radio"/> |
| Zoos, in general, care for the wellbeing of animals                                     | <input type="radio"/> | <input type="radio"/> | <input type="radio"/> | <input type="radio"/>      | <input type="radio"/> | <input type="radio"/> | <input type="radio"/> |
| Zoos should offer opportunities for people to touch the animals                         | <input type="radio"/> | <input type="radio"/> | <input type="radio"/> | <input type="radio"/>      | <input type="radio"/> | <input type="radio"/> | <input type="radio"/> |

\* These questions addressed a separate research question that is not included in this thesis

|                                                                               | Strongly disagree     | Disagree              | Somewhat disagree     | Neither agree nor disagree | Somewhat agree        | Agree                 | Strongly agree        |
|-------------------------------------------------------------------------------|-----------------------|-----------------------|-----------------------|----------------------------|-----------------------|-----------------------|-----------------------|
| The needs of humans should take priority over wildlife protection             | <input type="radio"/> | <input type="radio"/> | <input type="radio"/> | <input type="radio"/>      | <input type="radio"/> | <input type="radio"/> | <input type="radio"/> |
| It is acceptable to use wildlife in research even if it may harm some animals | <input type="radio"/> | <input type="radio"/> | <input type="radio"/> | <input type="radio"/>      | <input type="radio"/> | <input type="radio"/> | <input type="radio"/> |
| I care about animals as much as I do other people                             | <input type="radio"/> | <input type="radio"/> | <input type="radio"/> | <input type="radio"/>      | <input type="radio"/> | <input type="radio"/> | <input type="radio"/> |

Finally, we would like to learn a little bit more about you. None of this information will be used to identify you individually, and all responses will be kept anonymous.

How did you access this survey?

Facebook

Instagram

Snapchat

Email

Other (please specify)

Roughly how often do you visit a zoo or animal sanctuary? (select one)

Regularly (more than once a month)

Sometimes (once every few months)

Not very often (once or twice in the past 12 months)

Not in the past 12 months

Never

Are you (or a child in your immediate family) a member of a zoo or animal sanctuary?

Yes

No

Are you a member of a conservation organisation?

Yes

No

Are you or have you been a pet owner? (select one)

I am a pet owner currently

I have been a pet owner in the past, but don't have one currently

I have never been a pet owner

What is your gender identity?

Male

Female

Non-Binary/Gender Non-conforming

Prefer not to say

In what year were you born?

What is the highest level of education you have completed or are currently completing?  
(select one)

|                                       |                              |
|---------------------------------------|------------------------------|
| Year 9                                | Bachelor Degree              |
| Year 10                               | Graduate Certificate/Diploma |
| Year 11                               | Master Degree                |
| Year 12                               | Doctoral Degree              |
| Diploma                               | Other (please specify)       |
|                                       | <input type="text"/>         |
| Advanced Diploma and Associate Degree |                              |

Do you reside in an urban or rural locality?

|                                                                                 |
|---------------------------------------------------------------------------------|
| Urban (within towns or cities with more than 1,000 residents)                   |
| Rural (within a town of less than 1,000 residents or outside of a town or city) |

Do you have any further comments?

|                      |
|----------------------|
| <input type="text"/> |
|----------------------|

As a thank you for your time, we invite you to take part in our prize draw for six \$50 gift cards. To enter, please fill out the this section so that we can contact you in the event of a win. This data will be stored in a different file to your survey responses, and thus we will not be able to link you to your answers. If you do not wish to be entered in the prize draw, please skip this section and press 'continue'.

Please enter your email address if you wish to enter the prize draw

By pressing 'Continue' you are submitting your survey.

Continue
